# Supplementary material for: Preparation of Fe3O4-Embedded Poly(styrene)/Poly(thiophene) Core/Shell Nanoparticles and Their Hydrogel Patterns for Sensor Applications
Source: Materials (Basel). 2014 Jan 2;7(1):195–205. doi: 10.3390/ma7010195 (PMC5453122; doi:10.3390/ma7010195)

# Preparation of Fe<sub>3</sub>O<sub>4</sub>-Embedded Poly(styrene)/Poly(thiophene) Core/Shell Nanoparticles and Their Hydrogel Patterns for Sensor Applications

**Figure S1.** Optical micrograph of styrene droplets prepared by using SPG membrane emulsification.

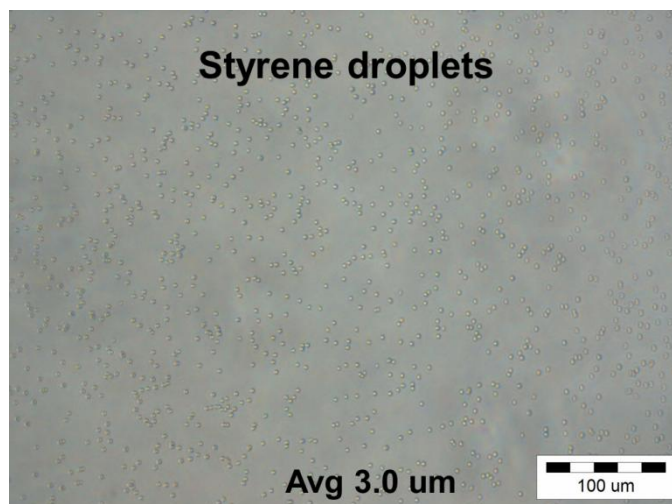

**Figure S2.** Particle size distributions of (a) Fe<sub>3</sub>O<sub>4</sub>-PSt and (b) Fe<sub>3</sub>O<sub>4</sub>-PSt/PTh nanoparticles dispersed in DDI water at the same concentration of about 0.01 wt%.

(a)

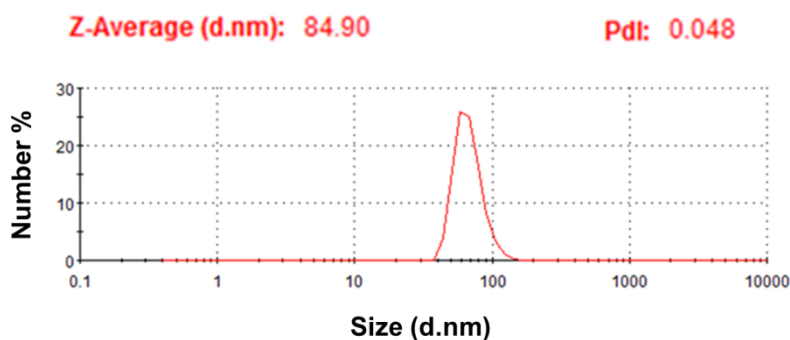

(b)

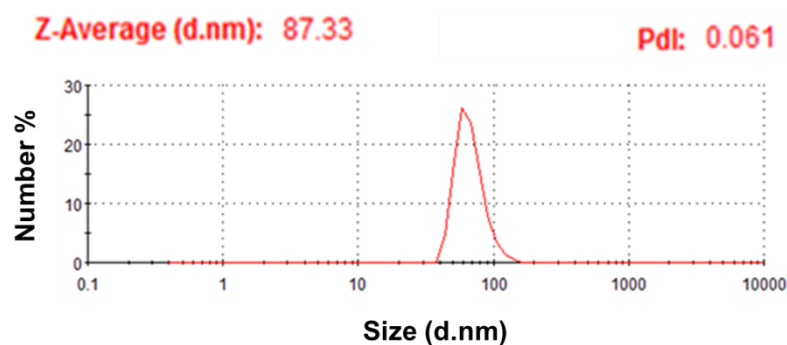

**Figure S3.** TGA curves of (a) as-synthesized PSt and (b)  $\text{Fe}_3\text{O}_4$ -PSt nanoparticles.

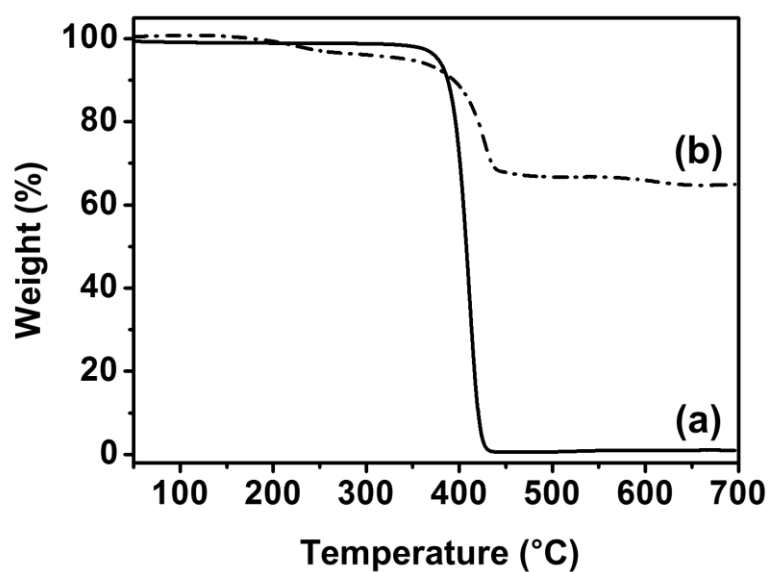

**Figure S4.** Fluorescence images of  $\text{Fe}_3\text{O}_4$ -PSt/PTh nanoparticles-immobilized hydrogel patterns, (a) 10 wt% and (b) 5 wt%  $\text{Fe}_3\text{O}_4$ -PSt/PTh nanoparticle concentrations, respectively. (c) is corresponding profile of fluorescence intensities recorded at the dashed lines in (a) and (b).

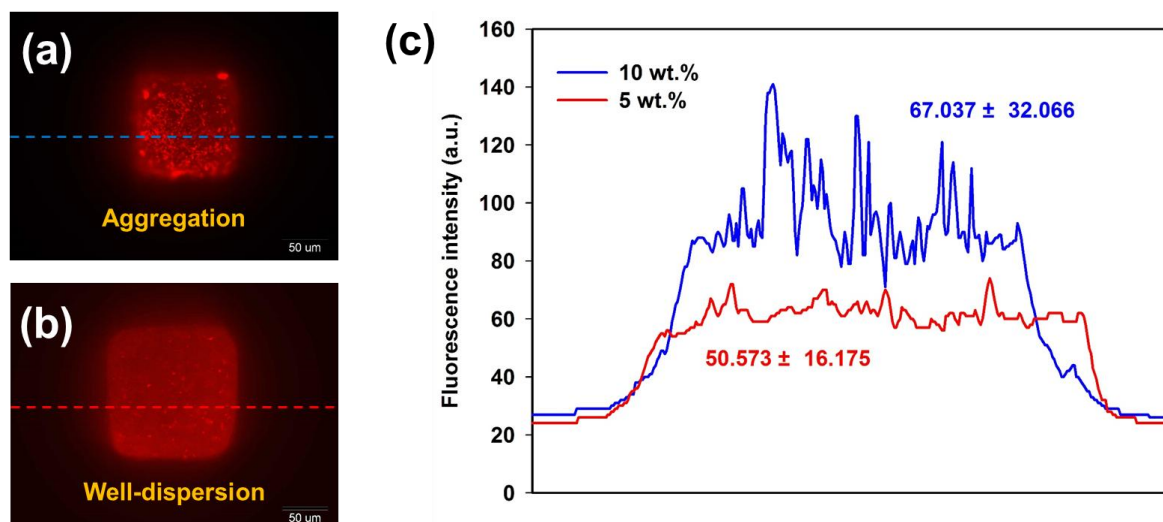

**Figure S5.** (a) Fluorescence micrographs of  $\text{Fe}_3\text{O}_4$ -PSt/PTh immobilized hydrogel patterns in the  $10\ \mu\text{g/mL}\ \text{Fe}^{3+}$  aqueous solution and (b) corresponding fluorescence intensity as a function of contact time.

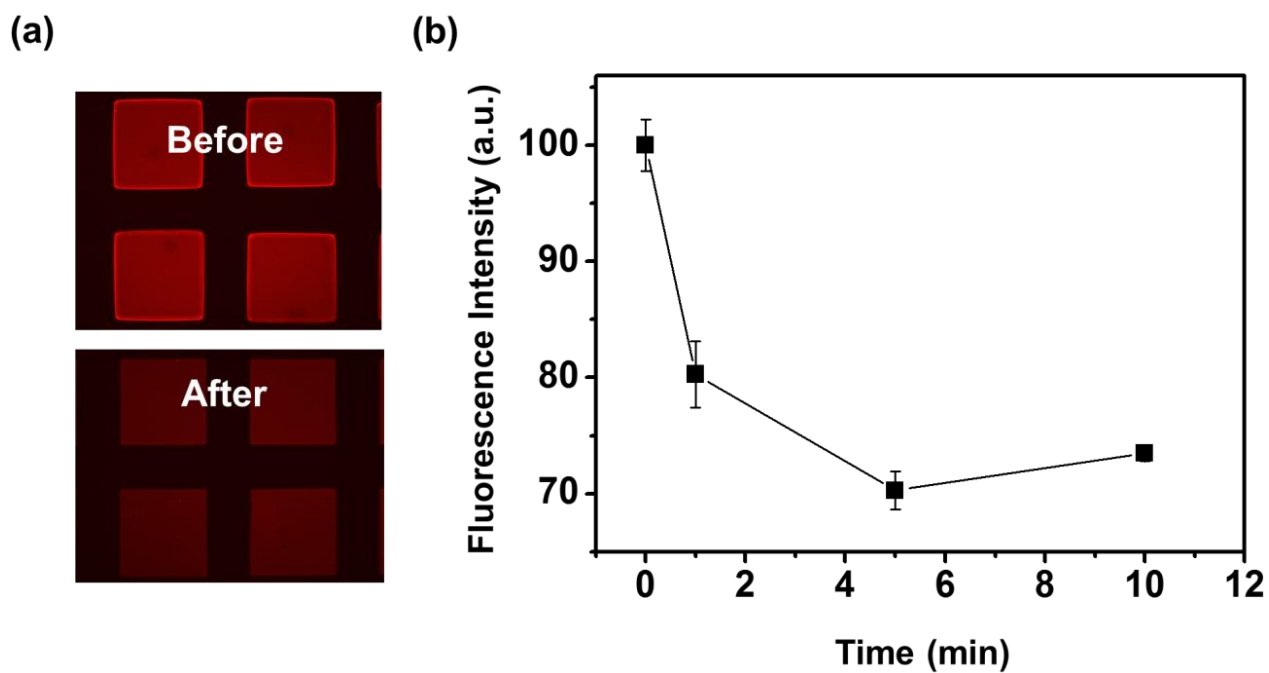

Supplement: Supplementary File 1 [file materials-07-00195-s001.pdf]
